# Supplementary material for: Culturable diversity and biochemical features of thraustochytrids from coastal waters of Southern China
Source: Springer Nature journal article supplement (doi:10.1007/s00253-013-5391-y), 2013-11-23
Supplement: 253_2013_5391_MOESM1_ESM.pdf [file 253_2013_5391_MOESM1_ESM.pdf]

**Culturable diversity and Biochemical Features of thraustochytrids from Coastal Waters of Southern China**

**Applied Microbiology and Biotechnology**

Ying Liu<sup>1,a</sup>, Purnima Singh<sup>1,a</sup>, Yuan Sun<sup>1</sup>, Shengji Luan<sup>1</sup> and Guangyi Wang<sup>1,2,3\*</sup>

<sup>1</sup>School of Environment and Energy, Peking University Shenzhen Graduate School, Shenzhen, 518055, China

<sup>2</sup>Tianjin University Center for Marine Environmental Ecology, School of Environmental Science and Engineering, Tianjin University, Tianjin 300072, China

<sup>3</sup>Department of Microbiology, University of Hawaii at Manoa, Honolulu, HI 86822, USA

<sup>a</sup>Both authors contributed equally to this work

**\*Corresponding author:**

Tel: (86) 022-8740210/(808) 956-8021

Fax: (86) 0755-8740210/(808) 956-5339

E-mail: [gywang@tju.edu.cn](mailto:gywang@tju.edu.cn)/[guangyi@hawaii.edu](mailto:guangyi@hawaii.edu)

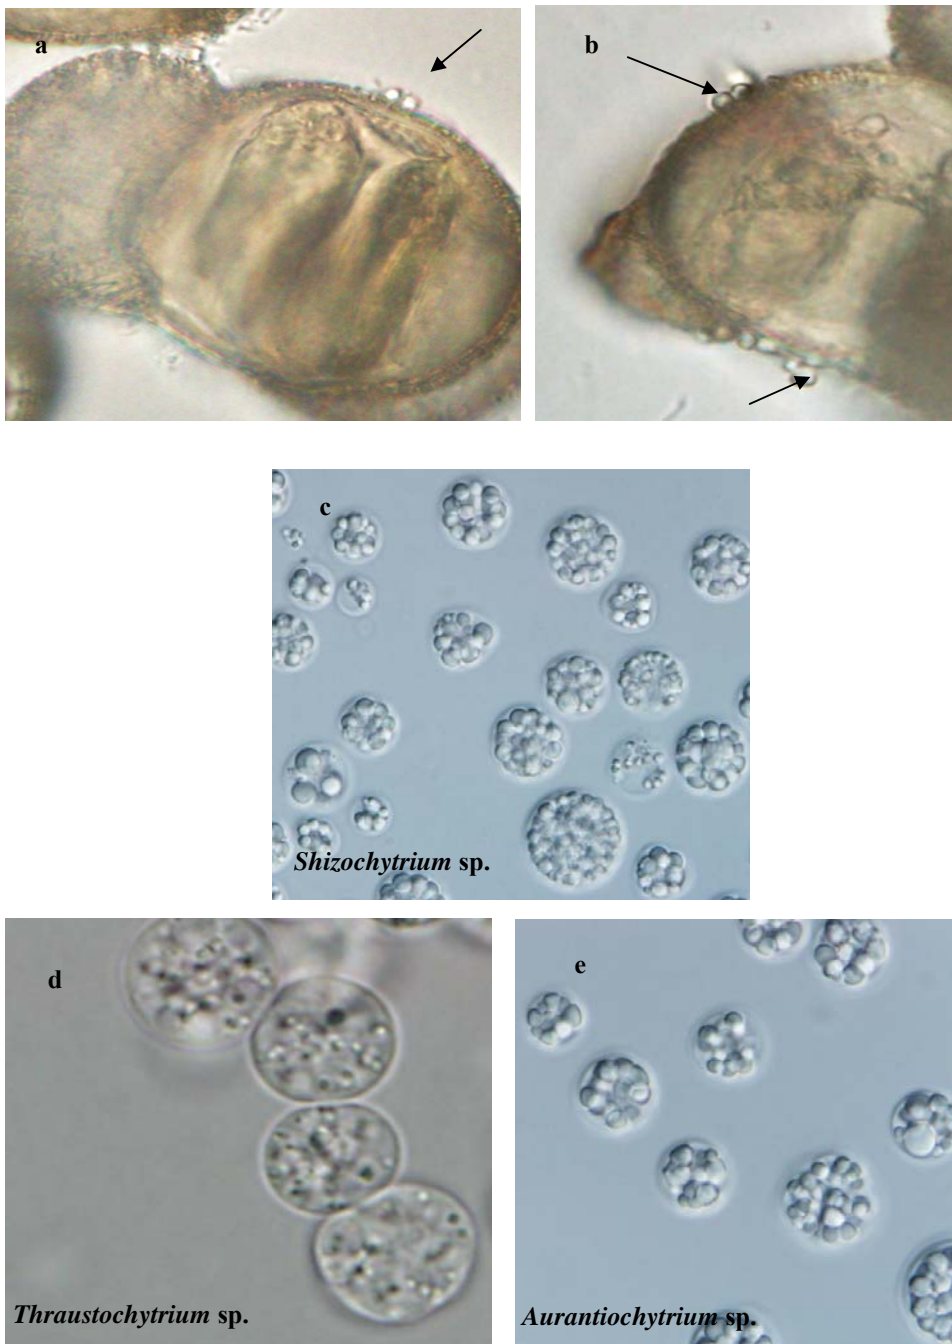

**Fig. S1** Light micrographs of the thraustochytrid cells; a) attached to pine pollen surface (marked with arrow) and different species isolated in the present study; b) *Shizochytrium* sp.; c) *Aurantiochytrium* sp.; d) *Thraustochytrium* sp.

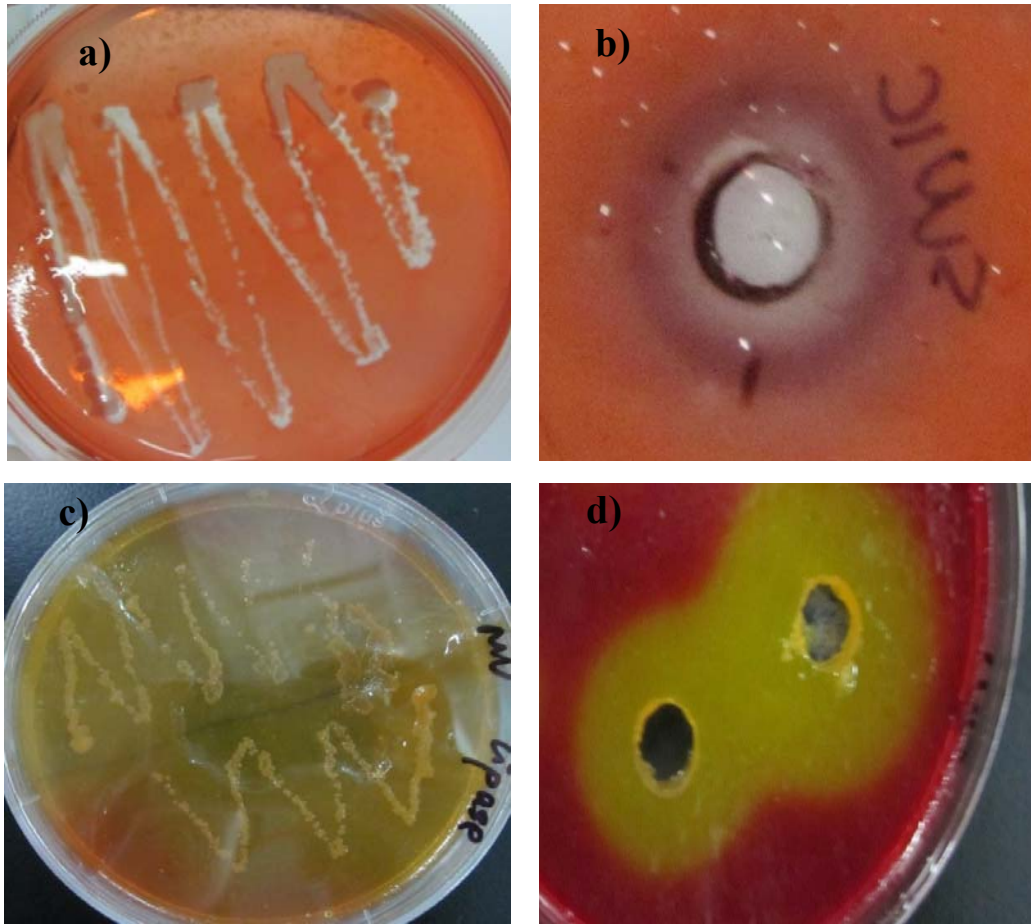

**Fig. S2** Qualitative screening of CMCase and lipase enzyme activity of the thraustochytrid isolates. (a) Thraustochytrid isolate, PKU#SW1, grown on CMC-MV plate; (b) Cell free culture supernatant of the thraustochytrid isolate, PKU#SW1; (c) Thraustochytrid isolate, PKU#Sed1, grown on chromogenic MV plate containing olive oil and phenol red; and (d) Cell free culture supernatant of the thraustochytrid isolate, PKU#Sed1

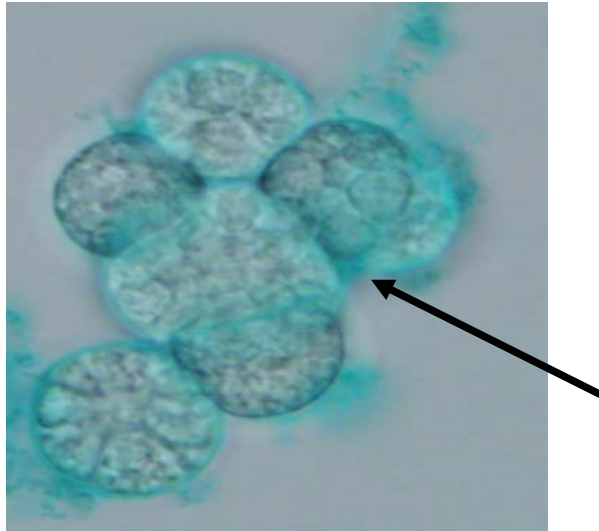

**Fig. S3** Phase contrast micrograph of Alcian Blue stained (EPS sheath marked with arrow) cell of the thraustochytrids isolate, PKU#SW1.

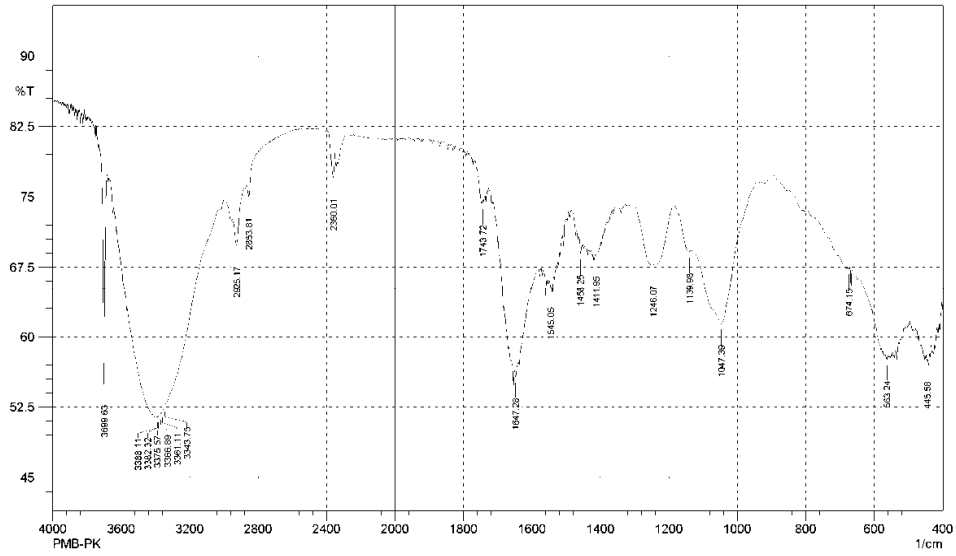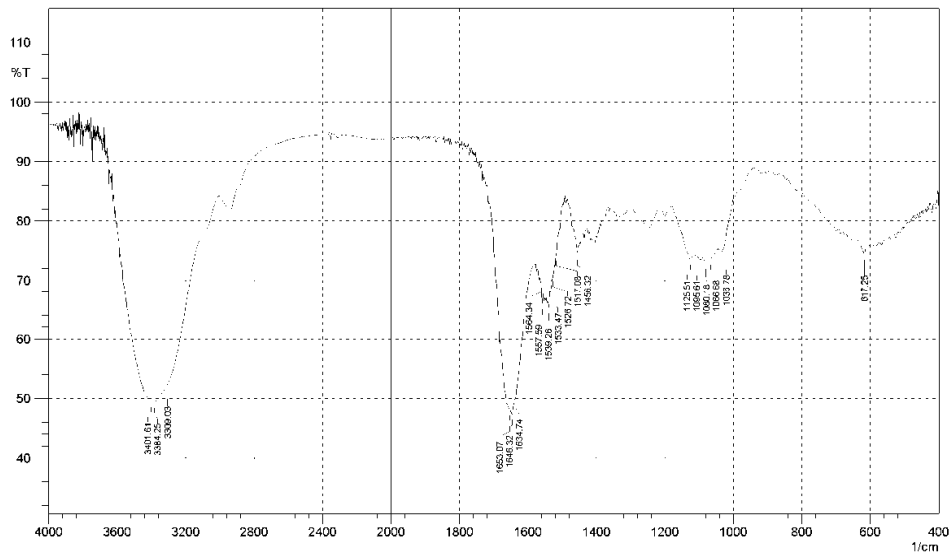

**Fig. S4** FTIR spectra of the EPS samples of the thraustochytrids. PKU#Sed1 (Top Panel) and PKU#SW1 (Bottom Panel)

**Table S1 Qualitative plate screening results of extracellular enzymes by 10 representative thraustochytrid isolates; Estimation of lipase produced by four strains of thraustochytrids; Biomass, Total fatty acid (TFA) and docosahexaenoic acid (DHA) yield of four thraustochytrid isolates at 4<sup>th</sup> day of growth**

| Isolate no. | Thraustochytrid genera        | Protease | Cellulase | Lipase | Growth media with olive oil (2 <sup>nd</sup> day) |                                       | Growth media without olive oil (1 <sup>st</sup> day) |                                       | Biomass (g l <sup>-1</sup> ) | TFA (% biomass) | DHA (% TFA) | DHA (g l <sup>-1</sup> ) |
|-------------|-------------------------------|----------|-----------|--------|---------------------------------------------------|---------------------------------------|------------------------------------------------------|---------------------------------------|------------------------------|-----------------|-------------|--------------------------|
|             |                               |          |           |        | OD660                                             | Lipase activity (U ml <sup>-1</sup> ) | OD660                                                | Lipase activity (U ml <sup>-1</sup> ) |                              |                 |             |                          |
| PKU#Mn4     | <i>Shizochytrium</i> sp.      | -        | +         | ++     | 6.914±0.570                                       | 4.630±1.517                           | 6.914±0.570                                          | 4.630±1.517                           | 7.1 ± 0.1                    | 51.5 ± 5.6      | 44.3 ± 1.3  | 1.6                      |
| PKU#Mn15    |                               | -        | +         | +      |                                                   |                                       |                                                      |                                       |                              |                 |             |                          |
| PKU#Mn35    |                               | -        | +         | +      |                                                   |                                       |                                                      |                                       |                              |                 |             |                          |
| PKU#Mn11    | <i>Aurantiochytrium</i> sp.   | -        | +         | +      |                                                   |                                       |                                                      |                                       |                              |                 |             |                          |
| PKU#Sed1    |                               | -        | +         | +++    | 6.607±0.289                                       | 11.874±12.110                         | 6.607±0.289                                          | 11.874±12.110                         | 7.5 ± 1.2                    | 37.9 ± 21.5     | 41.2 ± 0.2  | 1.2                      |
| PKU#SW7     |                               | -        | +         | +      |                                                   |                                       |                                                      |                                       |                              |                 |             |                          |
| PKU#SW1     | <i>Thraustochytrium</i> sp.   | -        | ++        | ++     | 2.737±0.233                                       | 2.635±1.004                           | 2.737±0.233                                          | 2.635±1.004                           | 3.8 ± 0.9                    | 23 ± 15.6       | 30.3 ± 4.4  | 0.3                      |
| PKU#SW2     |                               | -        | +         | ++     | 1.876±0.202                                       | 3.202±1.769                           | 1.876±0.202                                          | 3.202±1.769                           | 3.3 ± 1.1                    | 8.0 ± 0.9       | 27.3 ± 1.4  | 0.07                     |
| PKU#SW8     | <i>Thraustochytriidae</i> sp. | -        | +         | +      |                                                   |                                       |                                                      |                                       |                              |                 |             |                          |
| PKU#Mn16    |                               | -        | +         | +      |                                                   |                                       |                                                      |                                       |                              |                 |             |                          |

The result of enzyme activities (intensity of clearance zone), (-): negligible; (+): moderate; (++) : high; (+++) : very high activity

**Table S2 Effect of glucose concentration on EPS production ( $\pm$  SD) of the isolate PKU#Sed1 (5<sup>th</sup> day of growth)**

| <b>% Glucose concentration</b> | <b>EPS (<math>\mu\text{g ml}^{-1}</math>)</b> |
|--------------------------------|-----------------------------------------------|
| 0                              | 157.5 $\pm$ 0.04                              |
| 1                              | 194.4 $\pm$ 0.18                              |
| 3                              | 307.7 $\pm$ 0.01                              |
| 5                              | 315.3 $\pm$ 0.01                              |
| 7                              | 345.3 $\pm$ 0.19                              |

**Table S3 Fatty acid composition of the four thraustochytrid isolates (mean of triplicate analysis, SD ≤ 10%)**

| Isolate no.                             | Fatty acids (% TFA) |      |      |      |      |      |      |      |      |      |
|-----------------------------------------|---------------------|------|------|------|------|------|------|------|------|------|
|                                         | 14:0*               | 15:0 | 16:1 | 16:0 | 17:0 | 18:1 | 18:0 | 20:4 | 20:5 | 22:6 |
| PKU#Mn4 ( <i>Shizochytrium</i> sp.)     | 2.5                 | 0.5  | 0.2  | 51   | 0.2  | 0.2  | 0.8  | ---  | 0.3  | 44.3 |
| PKU#Sed1 ( <i>Aurantiochytrium</i> sp.) | 4.3                 | 0.7  | 0.3  | 51.9 | ---  | ---  | 0.9  | ---  | 0.7  | 41.2 |
| PKU#SW1 ( <i>Thraustochytrium</i> sp.)  | 14.7                | 10.7 | 2.1  | 36.4 | 1.6  | 3.1  | 0.5  | 0.1  | 0.3  | 30.3 |
| PKU#SW2 ( <i>Thraustochytrium</i> sp.)  | 21.8                | 9.7  | 2.5  | 35.2 | 0.8  | 1.9  | 0.3  | 0.03 | 0.28 | 27.3 |

**\*14:0- myristic acid; 15:0- pentadecyclic acid; 16:1- palmitoleic acid; 16:0- palmitic acid; 17:0- margaric acid; 18:1: oleic acid; 18:0: stearic acid; 20:4(n-6): arachidonic acid; 20:5(n-3): eicosapentaenoic acid (EPA); 22:6(n-3): docosahexaenoic acid (DHA).**
